# Supplementary material for: Towards a Global Barcode Library for Lymantria (Lepidoptera: Lymantriinae) Tussock Moths of Biosecurity Concern
Source: PLOS journal article supplement (doi:10.1371/journal.pone.0014280), 2010-12-09
Supplement: S2 (10.1371/journal.pone.0014280.s002) [file journal.pone.0014280.s002]

**Appendix S1. Taxonomic treatment of *Lymantria nebulosa* Wileman, revised status and *Lymantria subpallida* Okano, revised status**

The following taxonomic changes are presented in light of the DNA barcoding results of the present study and subsequent morphological investigation.

***Lymantria (Lymantria) nebulosa* Wileman, revised status**

(Figs. 1, 5)

*Lymantria nebulosa* Wileman, 1910:309. Holotype male: Taiwan: (BMNH: London, examined); Strand, 1923:324; Bang-Haas, 1926:132; Bryk, 1934:166; Schintlmeister, 2004:112; Pogue and Schaefer, 2007:97.

*Lymantria nebulosa* forma *aprilis* Strand, 1923:324. Holotype male: Taiwan (ZMHB, Berlin, not examined); Bang-Haas, 1926:132; Bryk, 1934:166; Pogue and Schaefer, 2007:97.

**Discussion.** Schintlmeister (2004) synonymized *L. nebulosa* with *L. sinica*. The results of the present study indicated that *L. nebulosa* was sufficiently distinct from *L. sinica* to warrant its status as a valid species. The following morphological differences support these molecular results.

The adult male specimens are similar in size, pattern, and overall coloration. The male of *L. nebulosa* (Fig. 1) is worn, so the pattern is faint and hard to diagnose it from *L. sinica* (Fig. 2). *Lymantria sinica* is much darker and has a distinct, white, zig-zag postmedial line, this line is not evident in *L.*

*nebulosa* due to the poor condition of the specimen. Schintlmeister (2004) states that *L. sinica* is quite variable from specimens having a white ground color to those being very dark as in Fig. 1. The male genitalia of the holotype of *L. sinica* is illustrated in Fig. 6. The principle differences between *L. sinica* and *L. nebulosa* are in structures of the valve. The apex of the valve is produced into a slightly elongate projection. In *L. sinica* the apical projection is narrow and along the same plane as the costa of the valve (Fig. 6). In *L. nebulosa* the apical projection is upright and broader at the base (Fig. 5). The ampulla is an elongate, median projection from the valve with a pointed, decurved apex and a vertical spine near its base. In *L. sinica* the vertical spine is more than twice the size as in *L. nebulosa*. The ventral distal angle of the valve is slightly produced in *L. sinica* and not produced in *L. nebulosa*. The aedeagus is very slightly sinuate in *L. sinica* and in *L. nebulosa* it is distinctly bent. The vesica is oval shaped in *L. sinica* and its long axis is parallel to the aedeagus. In *L. nebulosa* the vesica is oblong and emerges from the aedeagus with its long axis a right angle to the aedeagus.

***Lymantria (Nyctria) subpallida* Okano, revised status**

(Figs. 3, 7)

*Lymantria mathura subpallida* Okano, 1960:36. Holotype male: Taiwan: Puli-Wushe (Okano collection, not examined); Schintlmeister, 2004:127; Pogue and Schaefer, 2007:112.

**Discussion.** Schintlmeister (2004) synonymized *L. m. subpallida* with *L. m. aurora* Butler, stating that Okano (1960) gave no features in which to separate it from *L. m. aurora*. The results of this study clearly show that *L. subpallida* is molecularly distinct from *L. mathura* Moore. The following morphological differences support these molecular results.

There are virtually no differences in the overall pattern and color of *L. subpallida* (Fig. 3) and *L. mathura* (Fig. 4). The male genitalia exhibit several differences. The tegumen is more oval, being slightly higher vertically than horizontally in *L. mathura* (Fig. 8), and more round in *L. subpallida* (Fig. 7). The lateral process of the tegumen is much broader at the base in *L. mathura* than it is in *L. subpallida*. The valve is divided with the dorsal process bifurcate. In *L. mathura* the dorsal bifurcation is large and in *L. subpallida* the dorsal bifurcation is small, less than half the size as in *L. mathura*. The relative length of the ventral process of the valve to the overall length of the dorsal process is different between these species. In *L. mathura* the length of the ventral process is  $\frac{2}{3}$  the overall length of the dorsal process and in *L. subpallida* the ventral process is  $\frac{3}{4}$  the overall length.

## References

- Bang-Haas, O. 1926. Novitates macrolepidoterologicae: Katalog der im "Seitz" nicht enthalten und seitdem neu beschriebenen palaearktischen Macrolepidopteren // herausgegeben von Otto Bang-Haas. Blasewitz, Dresden, 238 pp.
- Bryk, F. 1934. Pars 62: Lymantriidae. *In*: Strand, E. (ed.) *Lepidoptorum Catalogus*. W. Junk, Berlin, 441 pp.
- Okano, M. 1960. New of little known moths from Formosa (3). *Annual Report of the Gakugei Faculty of the Iwate University* 15: 35–40.
- Pogue, M.G. and P.W. Schaefer. 2007. A review of selected species of *Lymantria* Hübner [1819] including three new species (Lepidoptera: Noctuidae: Lymantriinae). Forest Health Technology Enterprise Team, Technology Transfer, FHTET-2006-07, 223 pp.
- Schintlmeister, A. 2004. The taxonomy of the genus *Lymantria* Hübner [1819] (Lepidoptera: Lymantriidae). *Quadrifina* 7:1–248.
- Strand, E. 1923. 30. Genus: *Lymantria*. pp. 321–328. *In*: Seitz, A. (ed.). *The Macrolepidoptera of the World*. 10. Volume: The Indo-Australian Bombyces and Sphinges. Alfred Kernen, Stuttgart. 909 pp., 104 plates. [Signature 40, published 30 October 1923].
- Wileman, A.E. 1910. New Lepidoptera Heterocera from Formosa. *The Entomologist* 43:309–313.



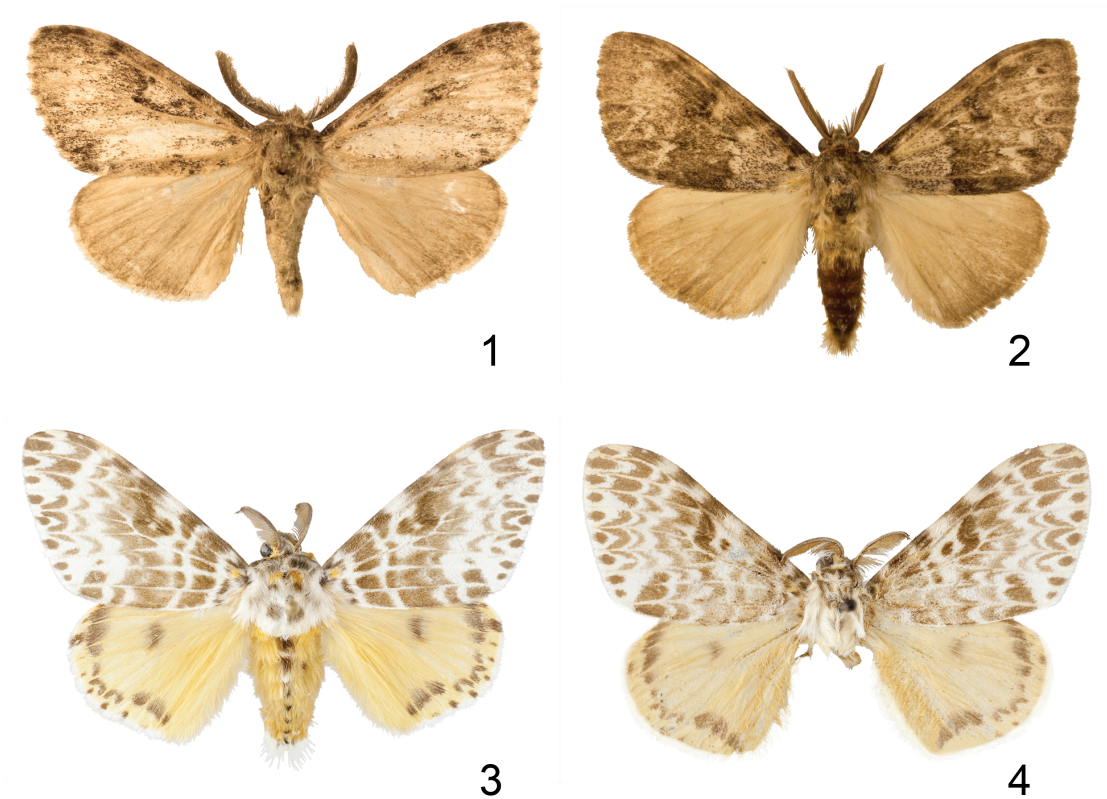

**Figs. 1–4.** Adults. 1. *Lymantria nebulosa*, China, Hainan, Wuzhi Shan. 2. *Lymantria sinica*, China, Hong Kong, Kadoori [sic] Agricultural Research Centre. 3. *Lymantria subpallida*, Taiwan, Nan Tow Co., Lu-shan, ca. 30 km E Wu-she. 4. *Lymantria mathura*, China, Yunnan.

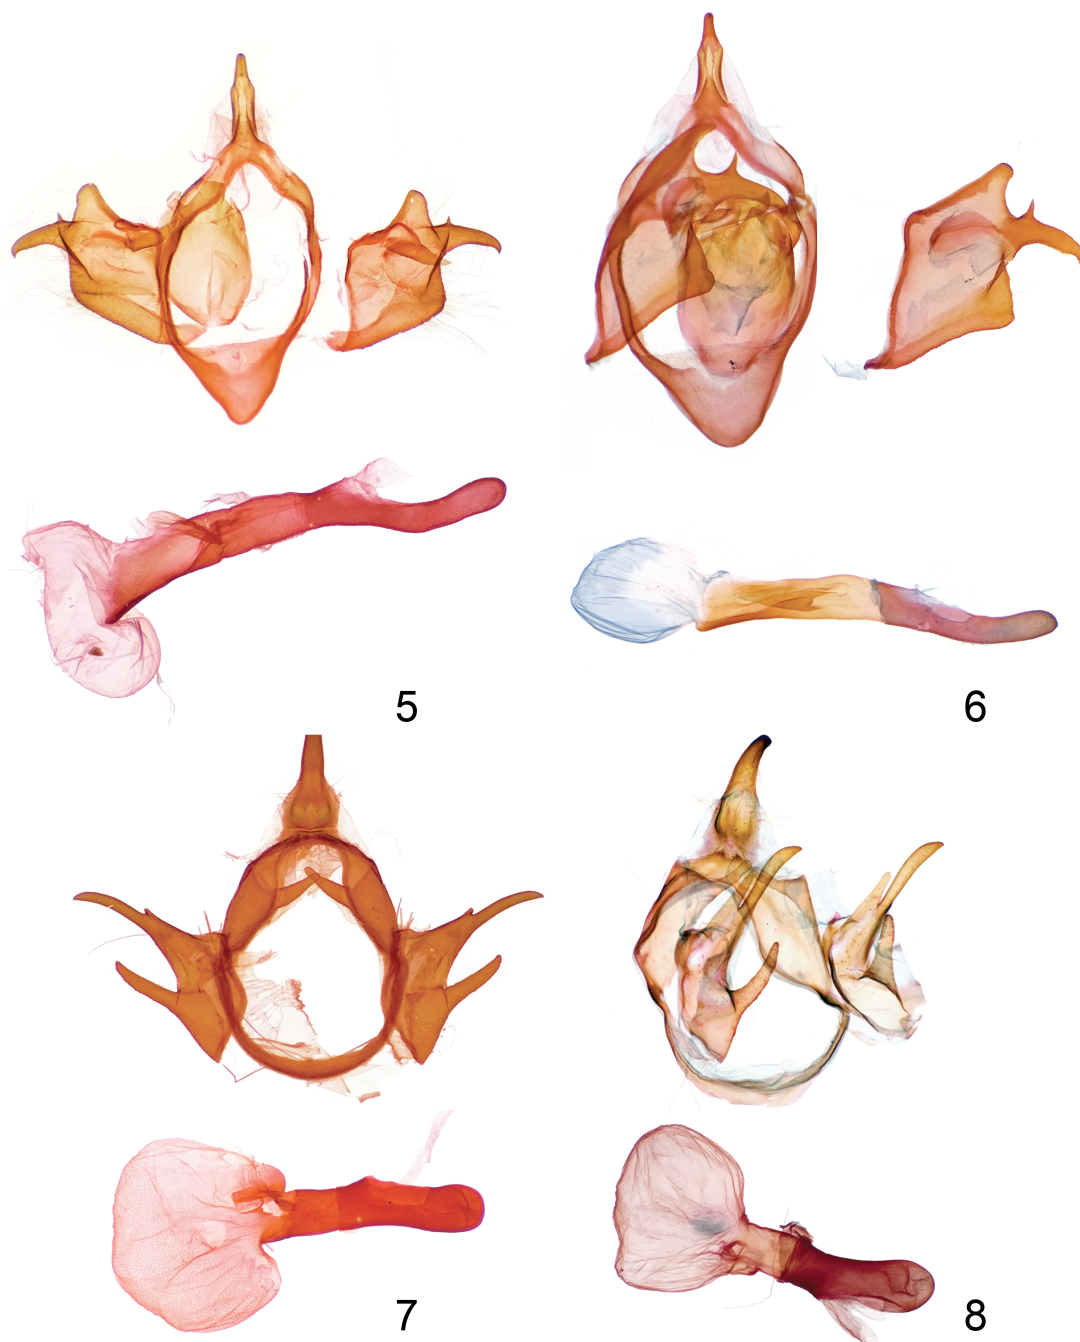

**Figs. 5–8.** Male genitalia. 5. *Lymantria nebulosa*, China, Hainan, Wuzhi Shan. 6. *Lymantria sinica*, Holotype, N. China. 7. *Lymantria subpallida*, Hong, Kadoorie [sic] Agricultural Research Centre. 8. *Lymantria mathura*, Ceylon [Sir Lanka].
